# Supplementary material for: A new synthesis of well-dispersed, core–shell Ag@SiO2 mesoporous nanoparticles using amino acids and sugars
Source: Royal Society of Chemistry journal article supplement (doi:10.1039/c3tb20210k), 2013-01-01
Supplement: c3tb20210k.pdf [file c3tb20210k.pdf]

## A new synthesis of well-dispersed, core-shell Ag@SiO<sub>2</sub> mesoporous nanoparticles using amino acid and sugar

Philippe Saint-Cricq, Junzheng Wang, Ayae Sugawara-Narutaki, Atsushi Shimojima and Tatsuya Okubo

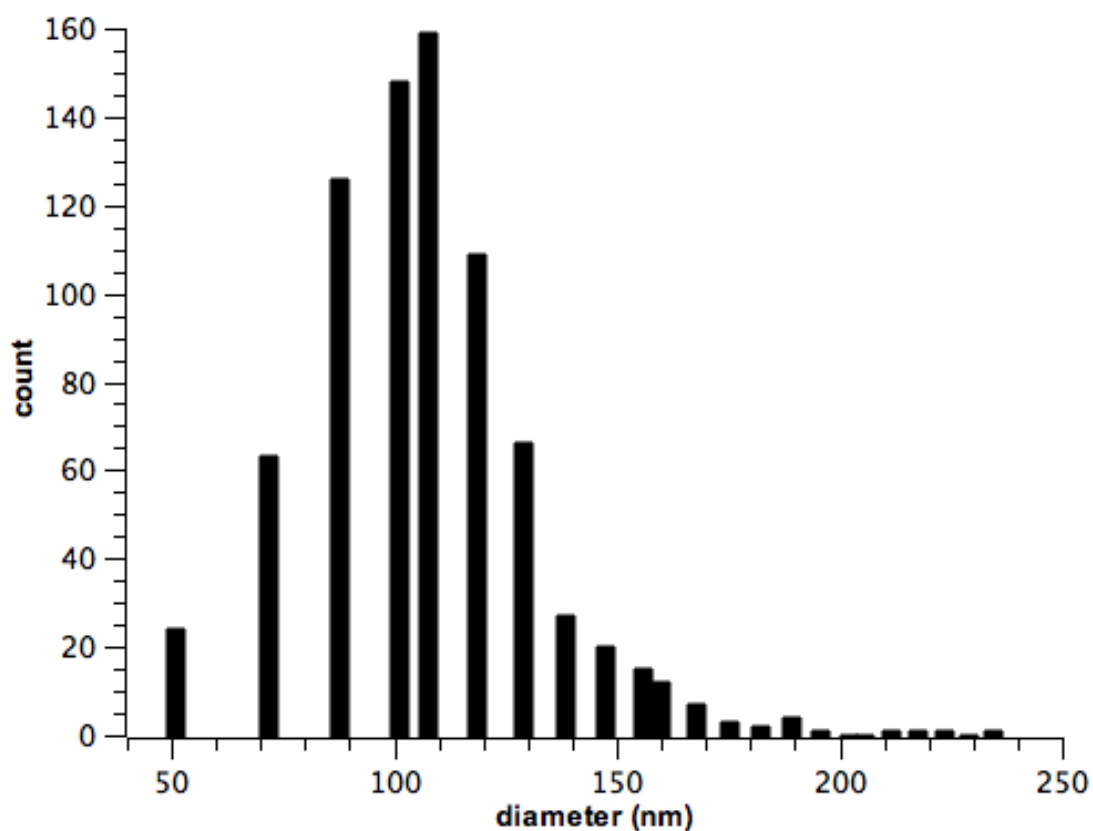

Fig S1: Particles size distribution obtained from 790 core-shell nanoparticle with ImageJ.<sup>1</sup>

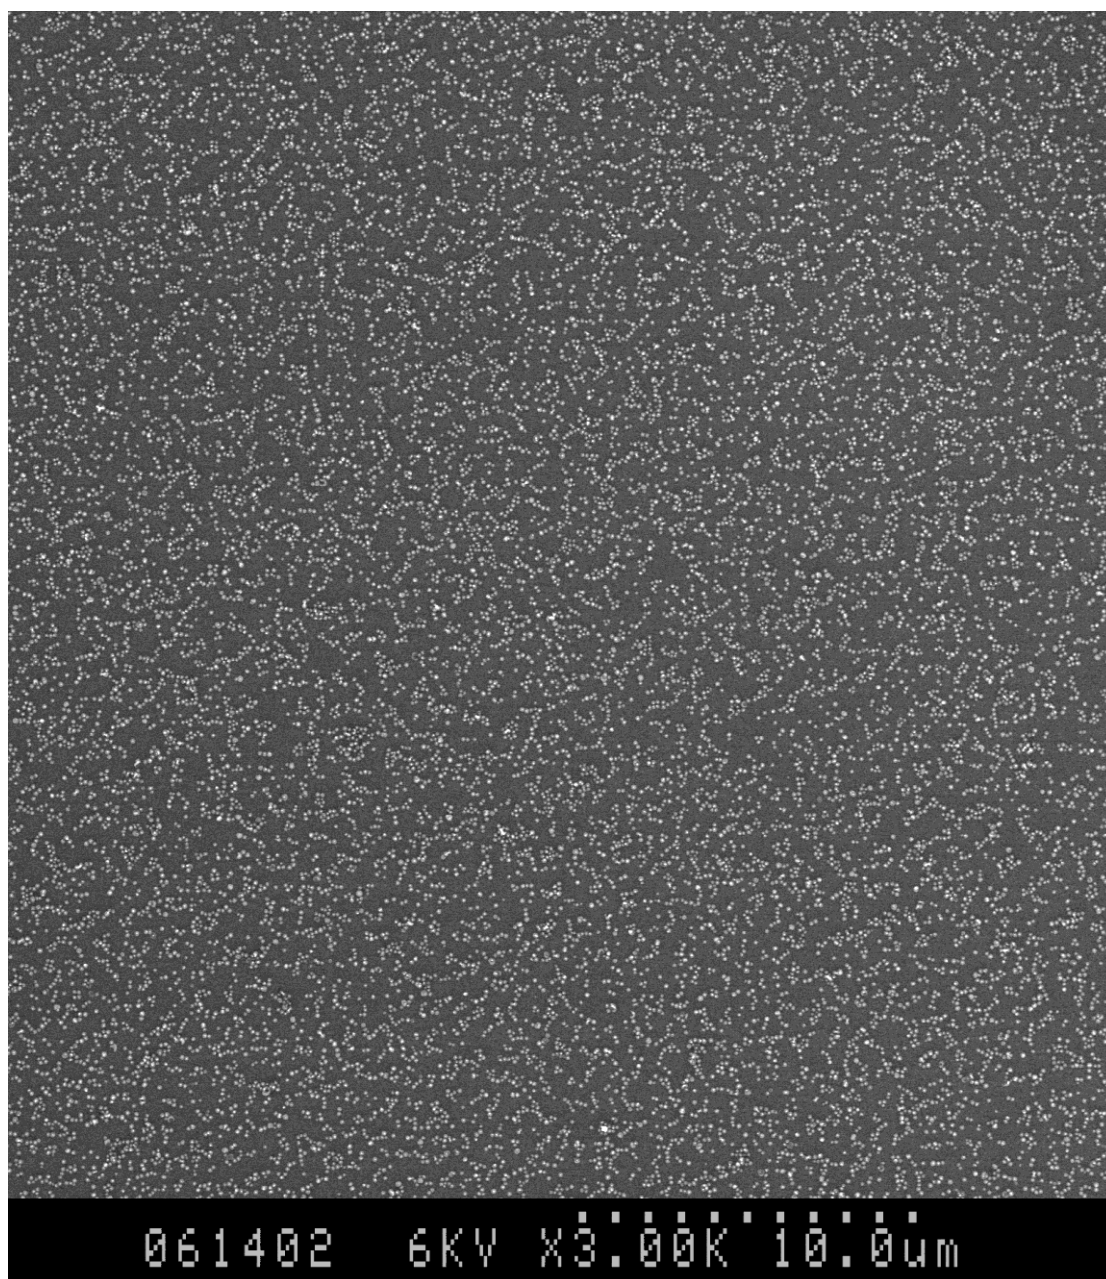

**Fig. S2:** SEM image of a silicon substrate covered with core-shell nanoparticles

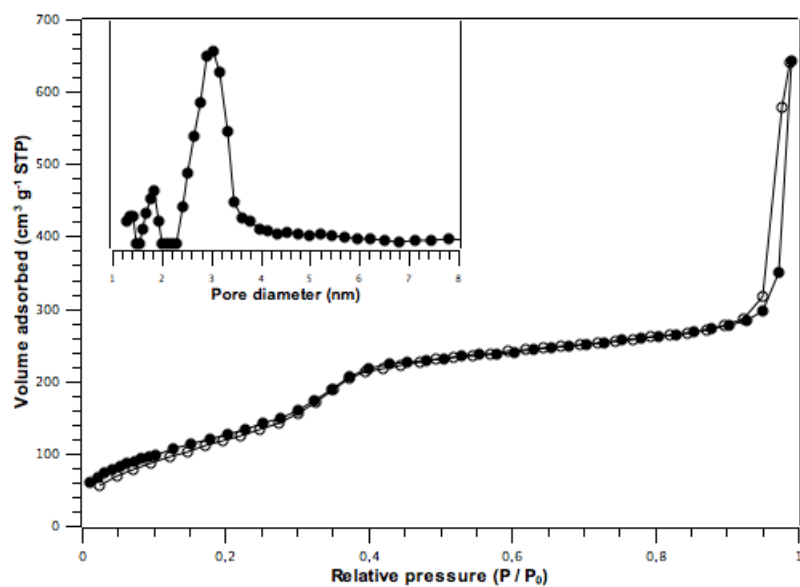

**Fig. S3** Nitrogen adsorption/desorption isotherms of Ag@MSN. Inset: NLDFT pore size distribution curve.

1. C.A. Schneider, W.S. Rasband, K.W. Eliceiri, *Nat. Methods*, 2012, **9**, 671-675.
